# Supplementary material
Source: publisher figshare collection journal article supplement (https://karger.figshare.com/ndownloader/files/22658918)
Supplement: Supplementary file 1 [file 22658918]

Supplementary Table

**APPLE EXPERT PANEL**

| Name | Specialty | Country |
| --- | --- | --- |
| Masatoshi Kudo | Hepatology | Japan |
| Kwang-Hyub Han | Korea |
| Sheng-Long Ye | China |
| Yi-Hsiang Huang | Taiwan |
| Shi-Ming Lin | Taiwan |
| Chung-Kwe Wang | Taiwan |
| Masafumi Ikeda | Oncology | Japan |
| Stephen Lam Chan | China |
| Su Pin Choo | Singapore |
| Ann Lii Cheng | Taiwan |
| Shiro Miyayama | Interventional Oncology | Japan |
| Jian Zhou | Surgery | China |
